# Supplementary material
Source: PubMed Central journal article supplement (PMC3028782)
Supplement: supp_55_2_913__1.pdf [file supp_55_2_913__1.pdf]

Supporting information for “Diversity of the early step of the futasosine pathway”

Chisato Arakawa<sup>1</sup>, Masahiro Kuratsu<sup>2</sup>, Kazuo Furihata<sup>3</sup>, Tomoshige Hiratsuka<sup>1</sup>, Nobuya Itoh<sup>1</sup>, Haruo Seto<sup>4</sup>, and Tohru Dairi<sup>1,5</sup>

*Biotechnology Research Center, Toyama Prefectural University, Toyama 939-0398, Japan,<sup>1</sup> Kyowa Hakko Bio Co. Ltd., Chiyoda-ku, Tokyo 100-8185, Japan<sup>2</sup> Division of Agriculture and Agricultural Life Science, The University of Tokyo, Bunkyo-ku, 113-8657, Japan,<sup>3</sup> Faculty of Applied Bio-science, Tokyo University of Agriculture, Setagaya-ku, 156-8502, Japan,<sup>4</sup> Graduate School of Engineering, Hokkaido University, Hokkaido 060-8628, Japan.<sup>5</sup>*

Contents:

1. Supporting Fig. 1. Electrophoresis of the overproduced and purified recombinant enzymes (S2 to S3).
2. Supporting Fig. 2. Synthesis of aminodeoxyfutasosine (S4 to S10).
3. Supporting Fig. 3. LC-MS analysis of the reaction products formed from aminodeoxyfutasosine by recombinant HP0089 (S11 to S13).
4. Supporting Fig. 4. Alignments of SCO4327 ORF with MqnB orthologs (S14).

**Supporting Fig. 1.**

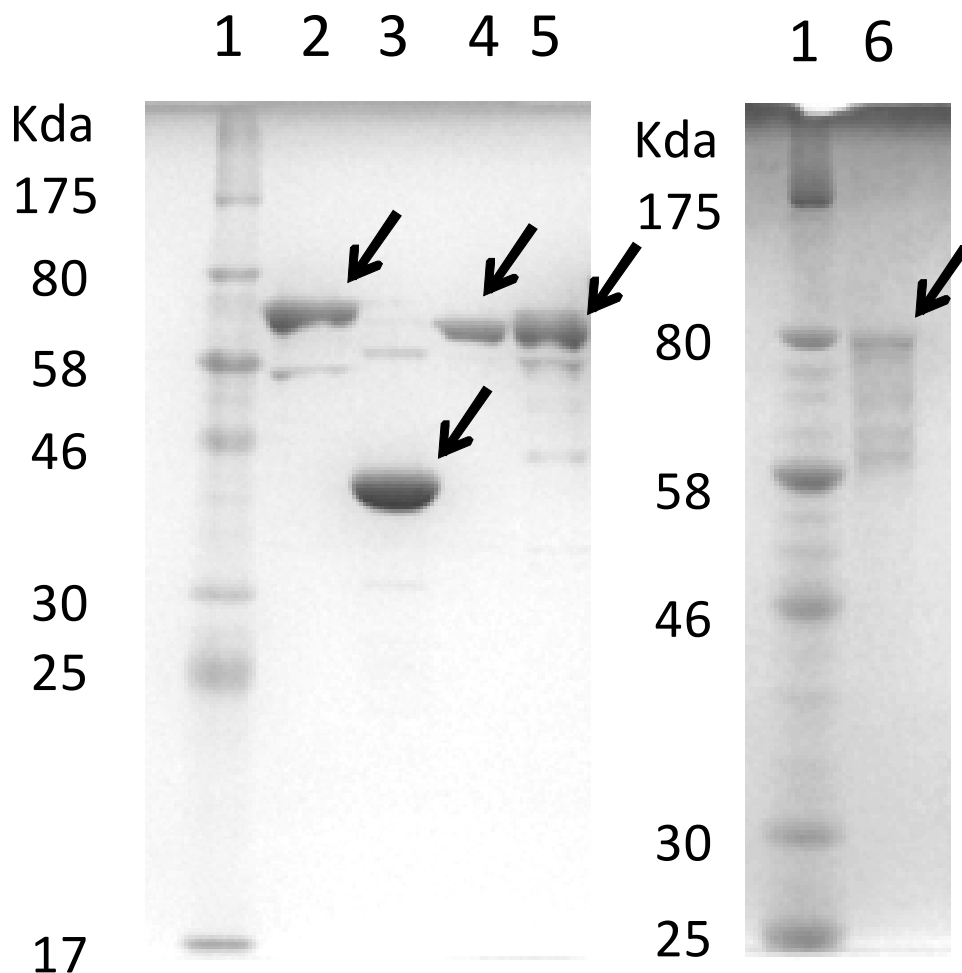

Electrophoresis of the overproduced and purified recombinant enzymes. Molecular mass marker (lane 1), Acel\_0106 (lane 2), Acel\_0264 (lane 3), HP0089 (lane 4), SCO4327 (lane 5), and SCO5662 (lane 6) were analyzed on an SDS-PAGE (12.5%). Proteins were stained with Coomassie brilliant blue R-250.

To overproduce Acel\_0106, Acel\_0264, HP0089, SCO4327 and SCO5662 as *N*-terminal maltose binding protein (MBP)-fused proteins or *N*-terminal His-tagged proteins, the corresponding DNAs were amplified by PCR with the following 5' and 3' primers: for Acel\_0106, 5'-TTTGAATTCAGCGTCAAGCGGCTCATCCTACTGC-3' and 5'-TTTAAGCTTTCATGGGCACCCTCCGTCGATCTC-3'; for Acel\_0264,

5'-CCCTGGCCATGGACACCCACGATCCCGTCTCGGTTGAGG-3' and  
5'-CCCCAAGCTTTCACAGCGACTCTCCCGCCGCTGTGGTTCG-3'; for HP0089,  
5'-GGGGGATCCGTGCAAAAATTGGCATTTTAGGGGC-3' and  
5'-AAACTGCAGCTAAAGCTCATCCACCATGCTTTTTTA-3'; for SCO4327,  
5'-TTTGAATTCACCTCCTCGTGGCCACCGCGGTCT-3' and  
5'-TTTCTGCAGTCAGCGCTCATGCGGTTTCCA ACTCTCAAGGACG-3'; and for  
SCO5662, 5'-TTTGGATCCACCGAGCACCTCGTCGACCCCGACGT-3' and  
5'-AAAAGCTTTCAGGAGGCGAGCCAGGCGGCGGTGTA-3'. To facilitate their  
insertion into expression vectors, additional restriction sites (underlined) were  
incorporated into the primers. After sequence confirmation, the amplified DNA  
fragments were inserted into pQE30 (Acel\_0264) and pMAL-c2X (Acel\_0106, HP0089,  
SCO4327 and SCO56626). The former plasmid and the latter plasmids were introduced  
into *E. coli* M15/pREP4 and *E. coli* TB1, respectively. Expression and purification  
conditions for the recombinant enzyme were essentially the same as those described in  
the manufacturer's protocols. Purity of the recombinant enzymes was analyzed by an  
SDS-PAGE on 12.5% gels. Protein concentration was determined by a protein-dye  
standard assay (Bio-Rad) using bovine serum albumin as a standard.

Assay for recombinant enzymes. A reaction mixture (50  $\mu$ l) containing 50 mM citrate  
buffer (pH 6.0), 0.4% (w/v) 2-mercaptoethanol, 10 mM futasine (or  
aminodeoxyfutasine) and 5 to 50  $\mu$ g of the purified recombinant enzyme was  
incubated at 30 °C for 30 min. The reaction product was subjected to HPLC analysis.  
The analytical conditions were as follows: Merck Mightisil RP-18GP Aqua column  
(250  $\times$  4.6 mm); temperature, 30 °C; detection, 230 nm; mobile phase, 20 mM  
potassium phosphate:acetonitrile = 100:0 at 0 min, and a linear gradient to 0:40 for an  
additional 40 min; flow rate, 0.8 ml/min.

## Supporting Fig. 2.

### Synthesis of aminodeoxyfutasine

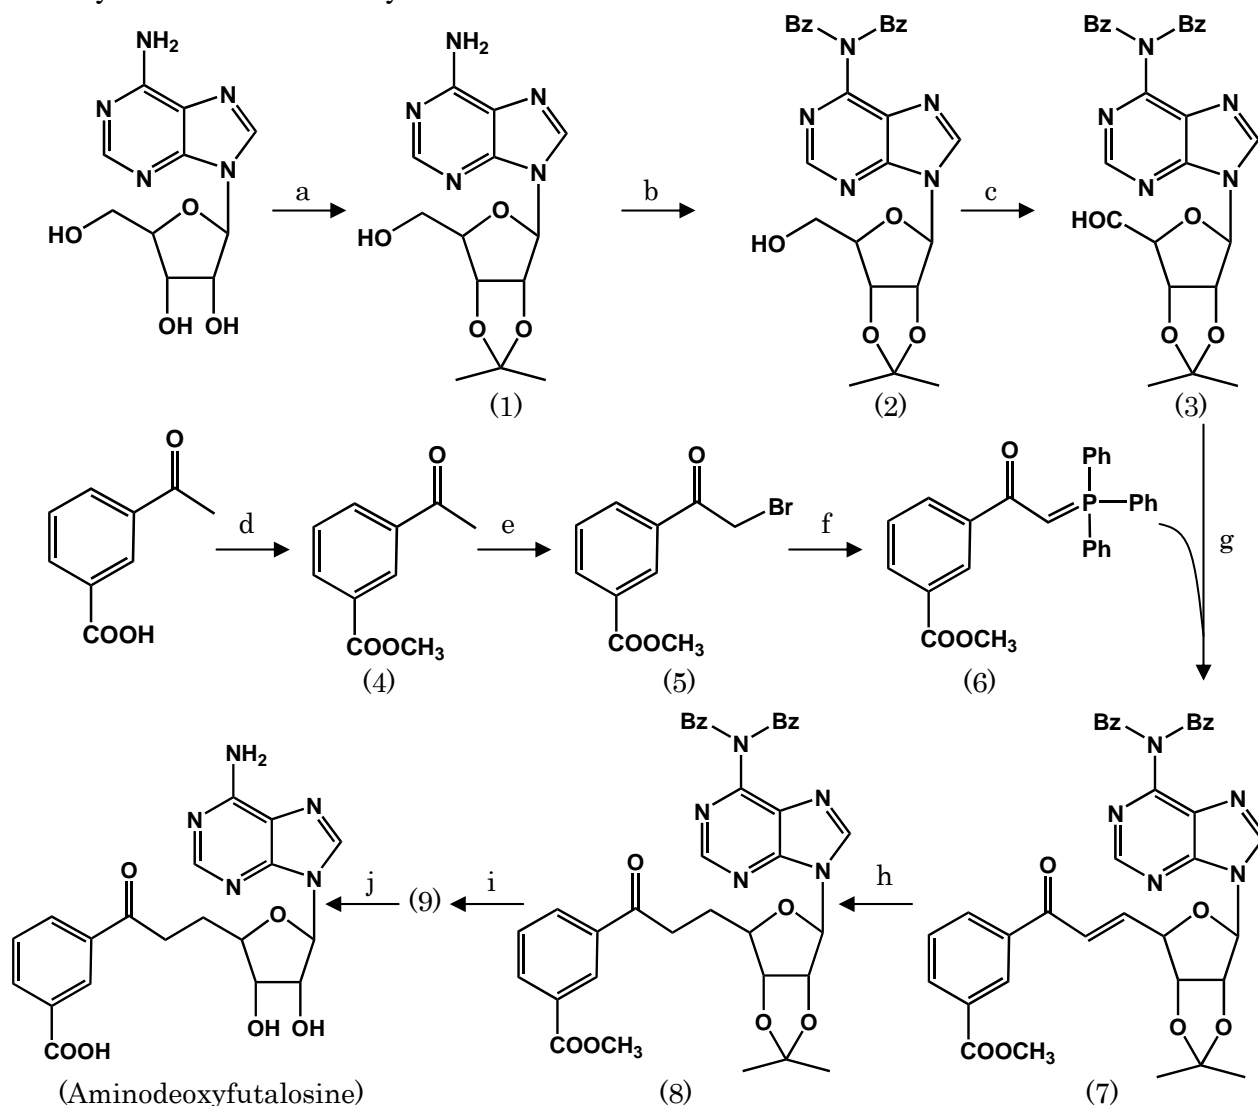

(a) 2,2-dimethoxypropane, acetone, *p*-toluenesulfonic acid, rt, O.N.; (b) (1)trimethylsilyl chloride, pyridine, rt, 30min; (2) benzoyl chloride, rt, 3h; (c) N'N'-dicyclohexylcarbodiimide, P<sub>2</sub>O<sub>5</sub>, DMSO, rt, 24h; (d) MeOH, H<sub>2</sub>SO<sub>4</sub>, rt, O.N.; (e) CuBr<sub>2</sub>, EtOAc, reflux, 3h; (f) triphenylphosphine, benzene, rt, O.N. (g) pyridine, rt, 24h (h) H<sub>2</sub>/Pd/C, rt, 2 days; (i) MeOH, K<sub>2</sub>CO<sub>3</sub>, rt, O.N. (j) 90% aq. TFA, rt, 3h

#### (a) Preparation of 2',3'-*O*-isopropylidene adenosine (1)

To a suspension of adenosine (1 g, 3.7 mmol) and 2,2-dimethoxypropane (1.5 g, 14.8 mmol) in acetone (70 mL) was added *p*-toluenesulfonic acid (1.4 g, 7.4 mmol) and stirred overnight at room temperature. After neutralization with saturated NaHCO<sub>3</sub>, the reaction mixture was evaporated and the residual aqueous layer was extracted with

chloroform. Compound **(1)** was obtained as white needle by crystallization from methanol (yield, 79%). **(1)**: C<sub>13</sub>H<sub>17</sub>N<sub>5</sub>O<sub>4</sub>; HR-TOF-MS (*m/z*), calcd. (M+H)<sup>+</sup> 308.1353, obsd. (M+H)<sup>+</sup> 308.1333; <sup>1</sup>H-NMR (400 MHz, CDCl<sub>3</sub>): δ 8.29 (s, 1H), 7.81 (s, 1H), 6.53 (d, *J* = 11.5 Hz, 1H), 5.93 (br s, 2H), 5.83 (d, *J* = 4.9 Hz, 1H), 5.19 (t, *J* = 5.3 Hz, 1H), 5.09 (dd, *J* = 5.3 Hz, 1.0 Hz, 1H), 4.52 (m, 1H), 3.95 (m, 2H), 3.77(m, 1H), 1.62 (s, 3H) , 1.35 (s, 3H).

**(b) Preparation of 2',3'-O,O-isopropylidene-N6,N6-dibenzoyladenosine (2)**

TMS-Cl (5 equiv) was added to a pyridine solution of **(1)** and stirred at room temperature for 30 min, followed by the addition of benzoyl chloride (2.6 equiv) and stirred for additional 3.5 hr. After addition of water (half volume of that of benzoyl chloride), the organic layer was separated and the solvent was removed by evaporation. To the residuess was added ice-cold 2N sulfuric acid and sodium hydrogen carbonate. The product was extracted with chloroform, washed with water and then subjected to silica gel chromatography (CHCl<sub>3</sub>:MeOH=50:1) to give **(2)** (yield, 75%). **(2)**: C<sub>27</sub>H<sub>25</sub>N<sub>5</sub>O<sub>6</sub>; HR-TOF-MS (*m/z*), calcd. (M+H)<sup>+</sup> 516.1878, obsd. (M+H)<sup>+</sup> 516.1891; <sup>1</sup>H-NMR (400 MHz, CD<sub>3</sub>Cl): δ 8.50 (s, 1H), 8.06 (s, 1H), 7.79 (d, *J* = 7.2 Hz, 4H), 7.43 (t, *J* = 7.2 Hz, 2H), 7.30 (m, 4H), 5.87 (d, *J* = 4.8 Hz, 1H), 5.19 (m, 1H), 5.04 (t, *J* = 3.0 Hz), 4.48 (m, 1H), 3.80 (m, 2H), 3.73(m, 1H), 1.58 (s, 3H) , 1.32 (s, 3H).

**(c) Preparation of (3)**

To a solution of 1 g of freeze-dried compound **(2)** in dried 15 ml of DMSO was added 1 mM of anhydrous phosphate (1.5 mL) and freeze-dried DCC (3.4 g, 16.25 mmol), and stirred at room temperature for 24 hr. Since the formed aldehyde **(3)** was unstable, the product was, without purification, used for synthesis of **(7)** after confirmation of the formation of **(3)** by TLC.

**(d) Preparation of methyl 3-acetylbenzoate (4)**

To a solution of 3-acetylbenzoic acid (5 g, 30.5 mmol) in 70 mL of methanol was added 0.3 mL of conc. sulfuric acid, and refluxed overnight. The reaction mixture was neutralized with saturated NaHCO<sub>3</sub> and concentrated *in vacuo*. The residual aqueous layer was diluted with water and extracted with ethyl acetate three times. The combined organic layer was concentrated *in vacuo* to afford white needles (yield, 93.2%). **(4)**: C<sub>10</sub>H<sub>10</sub>O<sub>3</sub>; HR-TOF-MS (*m/z*), calcd. (M+H)<sup>++</sup> 179.0703, observed (M+H)<sup>+</sup> 179.0725; <sup>1</sup>H-NMR (400 MHz, CDCl<sub>3</sub>): δ 8.56 (m, 1H, Ar2H), 8.20 and 8.13 (ddd, 2H, Ar4 and Ar6H), 7.53 (ddd, 1H, Ar5H), 3.93 (s, 3H, COOMe), 2.63 (s, 3H, COMe). <sup>13</sup>C-NMR (100 MHz, CDCl<sub>3</sub>): δ 197.4(s), 167.5(s),166.5(s), 137.5(s), 134.1(d), 132.5(d), 130.9(s),

129.8(d), 129.1(d), 52.6(q), 27.0(q); IR (KBr) = 1700 cm<sup>-1</sup>.

**(e) Preparation of methyl 3-bromoacetylbenzoate (5)**

An ethyl acetate solution of (4) was refluxed in the presence of copper (II) bromide for 3 hr. After the reaction, precipitates were removed by filtration. The organic layer was washed with water and concentrated *in vacuo* to afford white solid of (5) (yield, 90.4%). (5): C<sub>10</sub>H<sub>9</sub>BrO<sub>3</sub>; HR-TOF-MS (*m/z*), calcd. (M+H)<sup>+</sup> 256.9808, obsd. (M+H)<sup>+</sup> 256.9799; <sup>1</sup>H-NMR (400 MHz, CDCl<sub>3</sub>): δ 8.61 (m, 1H, Ar2H), 8.28 and 8.19 (2ddd, 2H, Ar4 and Ar6H), 7.60 (ddd, 1H, Ar5H), 4.49 (s, 2H, CH<sub>2</sub>Br), 3.97 (s, 3H, COOMe). <sup>13</sup>C-NMR (100 MHz, CDCl<sub>3</sub>): δ 190.5(s), 165.9(s), 135.0(s), 134.6(d), 132.9(d), 130.8(s), 129.9(d), 129.1(d), 52.5(q), 30.7(q); IR (KBr) = 1700 cm<sup>-1</sup>.

**(f) Preparation of methyl 3-(triphenylphosphoranylidene)acetyl benzoate (6)**

Triphenylphosphine (1 g, 3.82 mmol; ca. 1 eq) and (5) (1 g, 3.89 mmol) were dissolved in 5 mL of dry benzene and the solution was stirred overnight at room temperature under argon atmosphere. The reaction mixture was filtrated and the white-purple precipitates were dissolved in methanol/water (1:1) and neutralized with 0.5 N NaOH. After stirring at room temperature for 10 min, the mixture was extracted with ethyl acetate. After evaporation, (6) was obtained as a yellow powder (yield, 89.5%). (6): C<sub>28</sub>H<sub>23</sub>O<sub>3</sub>P; HR-TOF-MS (*m/z*), calcd. (M+H)<sup>+</sup> 439.1458, obsd. (M+H)<sup>+</sup> 439.1469; <sup>1</sup>H-NMR (400 MHz, CDCl<sub>3</sub>): δ 9.01-7.50 (m, 19H, 4Ar), 6.53 (d, *J* = 12 Hz, 1H, CH), 3.90 (s, 3H, COOMe). C<sub>28</sub>H<sub>24</sub>O<sub>3</sub>P by TOF-MS 439.1462 [M+H]<sup>+</sup> (calcd. 439.1463).

**(g) Preparation of (7)**

Pyridine (1 mL) and (6) (850 mg, 1.63 mmol; 0.5 eq.) were added into the flask containing (3) and stirred overnight. The reaction mixture was filtered with celite and the filtrate was washed successively with ice-cold water, 1N HCl and saturated brine. The organic layer was dried over anhydrous Na<sub>2</sub>SO<sub>4</sub>, concentrated *in vacuo*, and subjected to silica gel chromatography (hexane:ethyl acetate=1:2) to give (7) (yield, 24.0%). (7): C<sub>37</sub>H<sub>31</sub>N<sub>5</sub>O<sub>8</sub>; HR-TOF-MS (*m/z*), calcd. (M+H)<sup>+</sup> 674.2245, obsd. (M+H)<sup>+</sup> 674.2261; <sup>1</sup>H-NMR (400 MHz, CDCl<sub>3</sub>): δ: 8.60 (1.0H, s), 8.47 (1.0H, t, *J* = 1.69 Hz), 8.20 (1.0H, dt, *J* = 7.77, 1.39 Hz), 8.15 (1.0H, s), 7.95 (1.1H, dt, *J* = 7.83, 1.46 Hz), 7.81 (5.0H, dd, *J* = 8.33, 1.19 Hz), 7.52-7.47 (1.2H, m), 7.45 (2.3H, ddd, *J* = 9.91, 5.06, 2.18 Hz), 7.32 (5.0H, t, *J* = 7.73 Hz), 7.10 (1.0H, dd, *J* = 15.42, 5.01 Hz), 7.01 (1.0H, dd, *J* = 15.46, 1.29 Hz), 6.21 (1.0H, d, *J* = 2.28 Hz), 5.50 (1.0H, dd, *J* = 6.34, 2.28 Hz), 5.15 (1.0H, dd, *J* = 6.34, 3.97 Hz), 4.94 (1.0H, t, *J* = 3.97 Hz), 3.91 (3.0H, s), 1.65 (3.2H, s),

1.40 (3.2H, s).

<sup>13</sup>C-NMR (100 MHz, CDCl<sub>3</sub>) δ: 188.7, 172.1, 166.1, 152.4, 152.2, 144.0, 143.5, 137.4, 133.9, 133.1, 132.7, 130.8, 130.0, 129.6, 129.4, 129.0, 128.8, 128.4, 127.9, 127.7, 125.8, 115.3, 90.6, 86.3, 84.0, 83.8, 52.4, 29.7, 27.2, 25.4.

#### (h) Preparation of (8)

To a solution of 1 g of (7) in 100 mL of ethanol was added PtO<sub>2</sub> (25 mg) and hydrogenated with a Parr hydrogenation apparatus under 4 atm. for 2 days. After filtration with celite, the solvent was evaporated to afford (8) (yield, 65%). (8): C<sub>37</sub>H<sub>33</sub>N<sub>5</sub>O<sub>8</sub>; HR-TOF-MS (*m/z*), calcd. (M+H)<sup>+</sup> 676.2402, obsd. (M+H)<sup>+</sup> 676.24111; <sup>1</sup>H-NMR (CDCl<sub>3</sub>) δ: 8.64 (0.9H, s), 8.54 (1.0H, t, J = 1.54 Hz), 8.20 (1.0H, dt, J = 7.73, 1.44 Hz), 8.12 (1.0H, s), 8.07 (0.9H, dt, J = 7.83, 1.51 Hz), 7.83 (3.9H, dd, J = 8.33, 1.29 Hz), 7.50 (1.0H, t, J = 7.78 Hz), 7.45 (2.2H, tt, J = 7.44, 1.42 Hz), 7.33 (4.2H, t, J = 7.73 Hz), 6.06 (1.0H, d, J = 2.68 Hz), 5.45 (1.0H, dd, J = 6.54, 2.68 Hz), 4.89 (1.0H, dd, J = 6.54, 4.06 Hz), 4.32-4.28 (1.0H, m), 3.92 (3.1H, s), 3.19-3.04 (2.0H, m), 2.28-2.10 (2.0H, m), 1.59 (3.1H, s), 1.37 (3.1H, s).

<sup>13</sup>C-NMR (100 MHz, CDCl<sub>3</sub>) δ: 197.9, 172.2, 166.2, 152.4, 152.1, 144.0, 136.9, 134.0, 134.0, 133.0, 132.1, 130.7, 130.1, 129.5, 129.1, 128.9, 128.7, 128.4, 128.0, 115.1, 90.4, 85.9, 83.9, 52.4, 34.4, 27.3, 27.2, 25.4.

#### (i) Preparation of (9), a debenzoyated (8)

To a solution of 1 g of (8) in 90% methanol was added K<sub>2</sub>CO<sub>3</sub> (815mg) and stirred overnight at room temperature. The reaction mixture was evaporated to dryness and subjected to Sephadex LH-20 column chromatography to afford (9) (yield, 38.0%). (9): C<sub>22</sub>H<sub>23</sub>N<sub>5</sub>O<sub>6</sub>; HR-TOF-MS (*m/z*), calcd. (M+H)<sup>+</sup> 454.1721, obsd. (M+H)<sup>+</sup> 454.1702; <sup>1</sup>H-NMR (400MHz, CD<sub>3</sub>OD) δ: 8.42 (1.0H, d, J = 1.19 Hz), 8.16 (1.0H, s), 8.09 (1.1H, s), 8.04 (1.0H, dd, J = 7.53, 1.19 Hz), 7.82 (1.0H, dd, J = 7.93, 1.19 Hz), 7.34 (1.0H, t, J = 7.73 Hz), 6.03 (1.0H, t, J = 1.19 Hz), 5.41-5.39 (1.0H, m), 4.87 (0.9H, dd, J = 6.34, 3.57 Hz), 4.18 (1.0H, dd, J = 10.31, 6.74 Hz), 3.04 (2.0H, td, J = 6.84, 2.64 Hz), 2.04-1.98 (2.0H, m), 1.47 (3.0H, s), 1.27 (3.1H, s).

<sup>13</sup>C-NMR (100 MHz, CDCl<sub>3</sub>) δ: 201.2, 173.3, 157.3, 154.0, 150.3, 141.8, 138.6, 137.8, 134.9, 130.9, 130.1, 129.3, 120.5, 115.8, 91.0, 87.2, 85.4, 85.2, 35.5, 28.8, 27.5, 25.6.

#### (j) Preparation of aminodeoxyfufalosine

(9) was dissolved in 10% TFA and stirred at room temperature for 4 hr. After concentration *in vacuo*, crystalline aminodeoxyfufalosine was collected by filtration

(yield, 43%). Data for aminodeoxyfufalosine is as following:

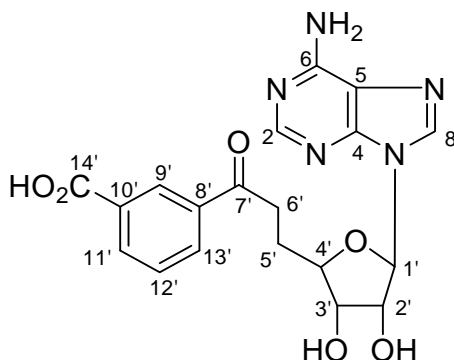

Structure of aminodeoxyfufalosine

NMR data of aminodeoxyfufalosine

| Aminodeoxyfufalosine (DMSO-D <sub>6</sub> ) |                 |                             |                            |                      |
|---------------------------------------------|-----------------|-----------------------------|----------------------------|----------------------|
| C                                           |                 | $\delta$ ( <sup>13</sup> C) | $\delta$ ( <sup>1</sup> H) | Multiplicity         |
| 2                                           | CH              | 152.4                       | 8.43                       | s                    |
| 4                                           | C               | 149.4                       |                            |                      |
| 5                                           | C               | 119.3                       |                            |                      |
| 6                                           | C               | 155.9                       |                            |                      |
| 8                                           | CH              | 140.3                       | 8.13                       | s                    |
| 1'                                          | CH              | 87.8                        | 5.85                       | d (5.1)              |
| 2'                                          | CH              | 83.1                        | 4.69                       | t (5.1)              |
| 3'                                          | CH              | 73.2                        | 4.14                       | t (5.1)              |
| 4'                                          | CH              | 73.2                        | 3.96                       | td (7.3, 5.1)        |
| 5'                                          | CH <sub>2</sub> | 27.3                        | 2.08                       | ddt (13.4, 7.3, 7.1) |
|                                             |                 |                             | 2.01                       | ddt (13.4, 7.3, 7.1) |
| 6'                                          | CH <sub>2</sub> | 34.4                        | 3.19                       | t (7.1)              |
| 7'                                          | C=O             | 199.0                       |                            |                      |
| 8'                                          | C               | 136.9*                      |                            |                      |
| 9'                                          | CH              | 129.3                       | 8.43                       | br t (1.6)           |
| 10'                                         | C               | 131.3*                      |                            |                      |
| 11'                                         | CH              | 133.6                       | 8.14                       | d (7.7)              |
| 12'                                         | CH              | 128.4                       | 7.61                       | t (7.7)              |
| 13'                                         | CH              | 132.1                       | 8.14                       | d (7.7)              |
| 14'                                         | COOH            | 166.8                       |                            |                      |
|                                             | NH <sub>2</sub> |                             | 7.37                       | br s                 |

\*Exchangeable

Aminodeoxyfufalosine

C<sub>19</sub>H<sub>19</sub>N<sub>5</sub>O<sub>6</sub>; HR-TOF-MS (*m/z*), calcd. (M+H)<sup>+</sup> 414.1408, obsd. (M+H)<sup>+</sup> 414.1397; IR  $\nu$  KBr max: 3382, 1681, 1203 cm<sup>-1</sup>; UV (MeOH)  $\nu_{\max}$  nm (log  $\epsilon$ ), 258 (3.9); mp, >200 °C (dec).



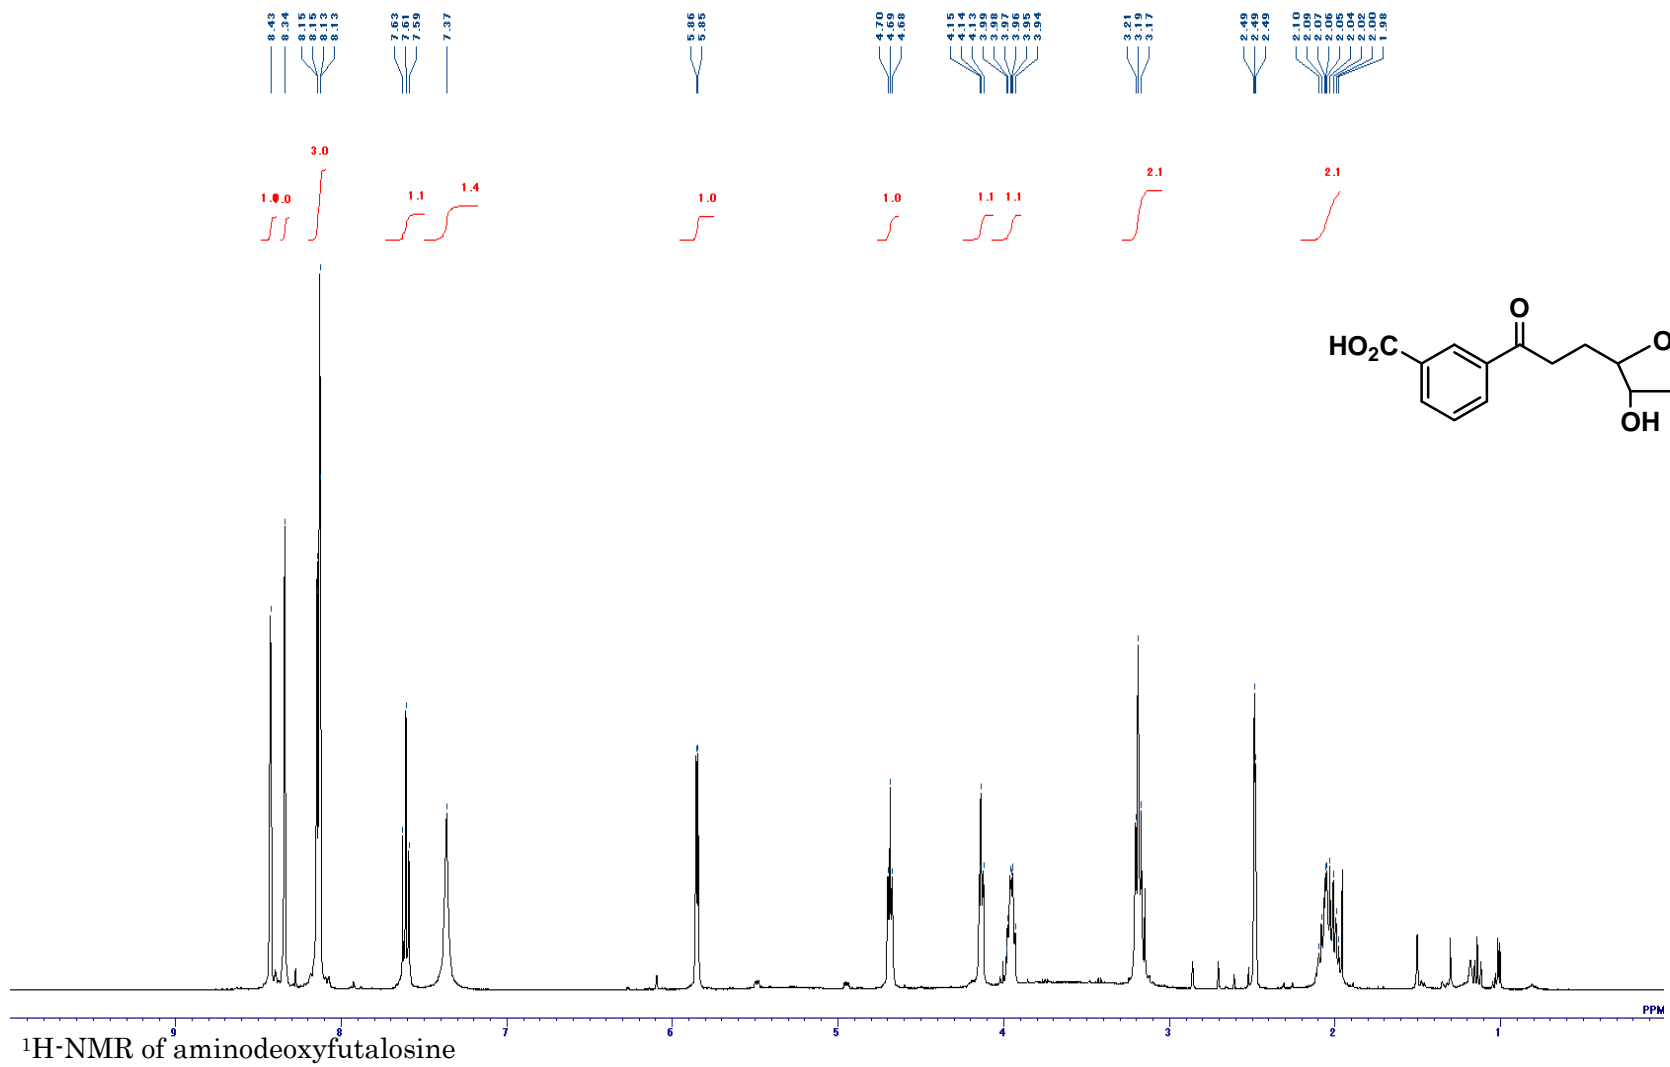

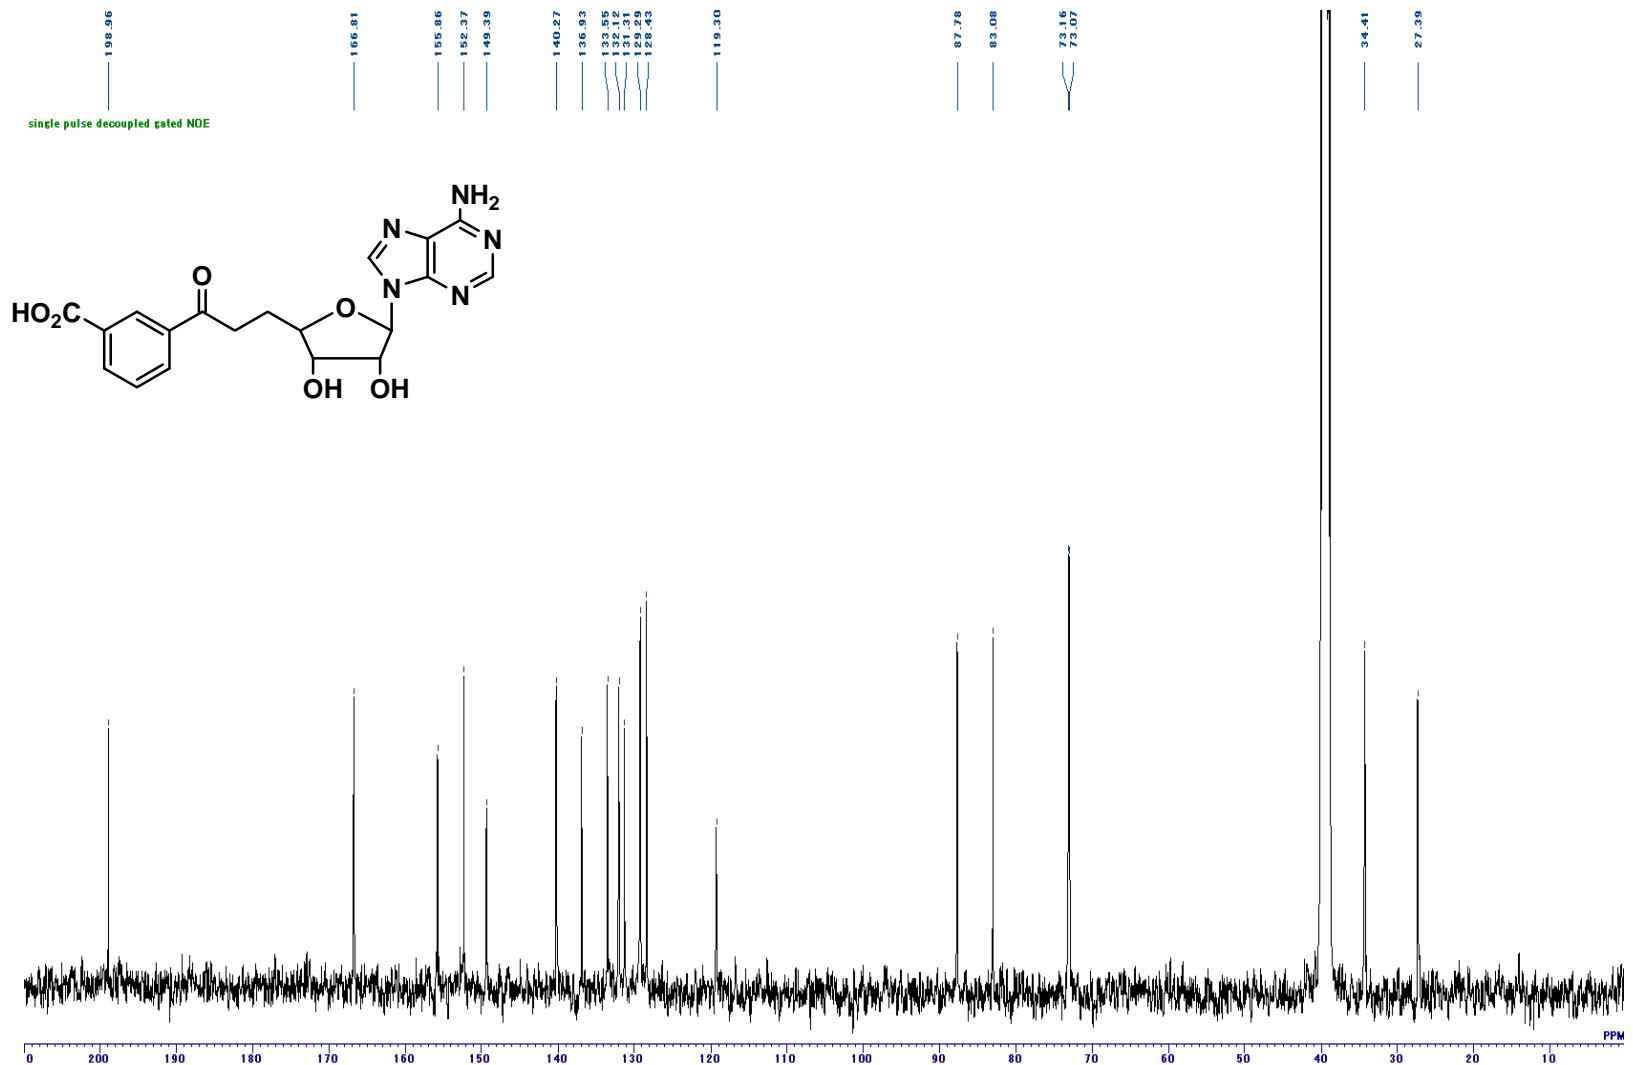

<sup>13</sup>C-NMR of aminodeoxyfutalosine

### Supporting Fig. 3.

LC-MS analysis of the reaction products formed from AFL by recombinant HP0089. The reaction products (A) and the standard DHFL (B) were analysed.

Date; 10/7/15  
Column; Sunniest, RP-Aqua (5 $\mu$ m, 150 X 2.0 mm), 30° C  
Flow; 0.3 ml/min  
Solvent; A, 0.1% HCOOH in H<sub>2</sub>O  
B, CH<sub>3</sub>CN

Mode; positive  
Injection; 5  $\mu$ l

| Gradient; Method |            |            |
|------------------|------------|------------|
| Time (min)       | Sol. B (%) | Sol. A (%) |
| 0                | 0          | 100        |
| 5                | 0          | 100        |
| 20               | 90         | 10         |
| 30               | 90         | 10         |

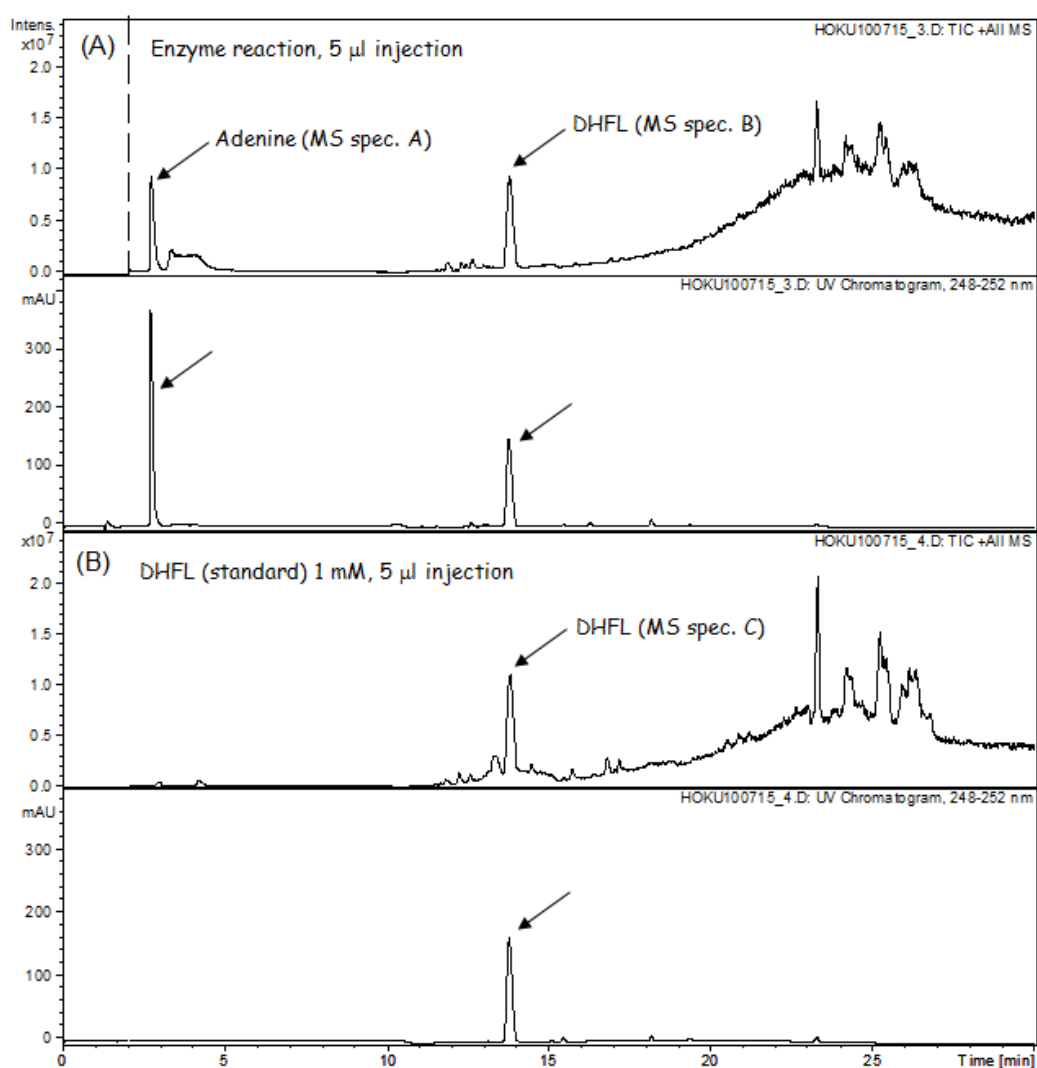

Adenine (MS spec. A)

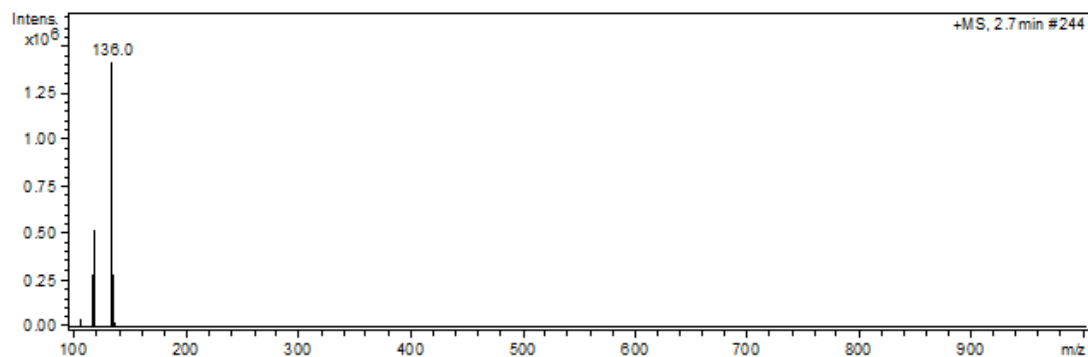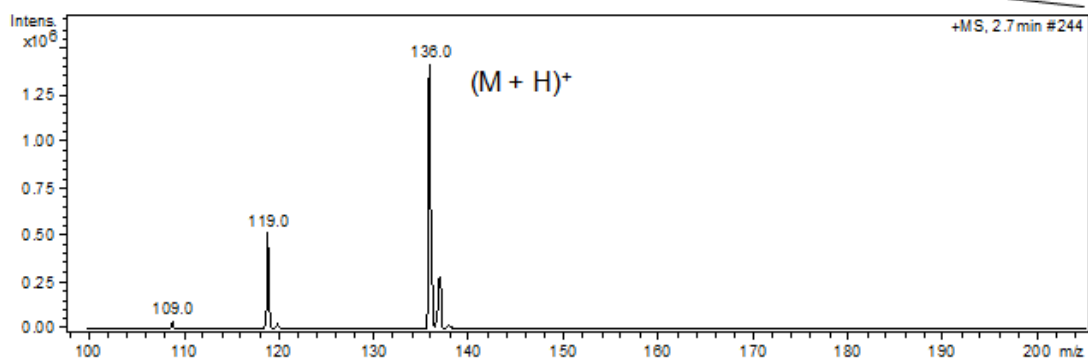

DHFL (MS spec. B)

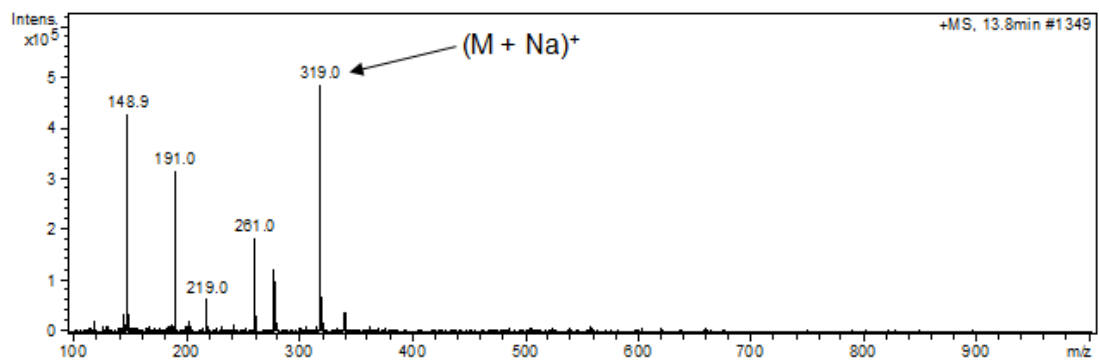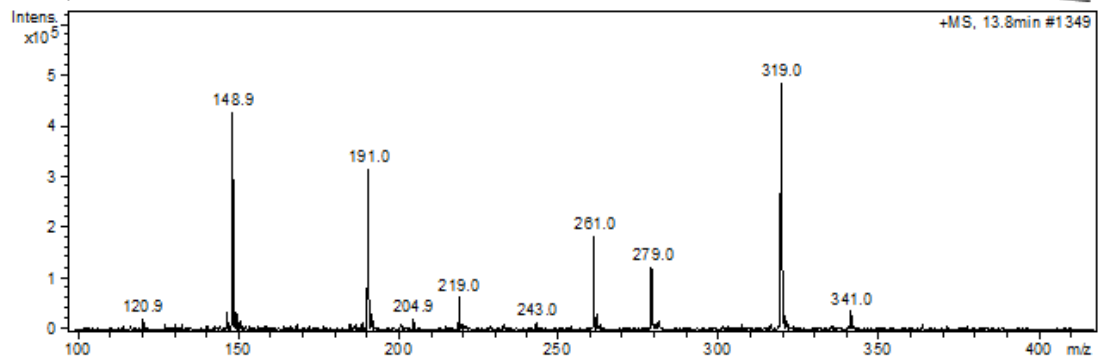

DHFL (MS spec. C)

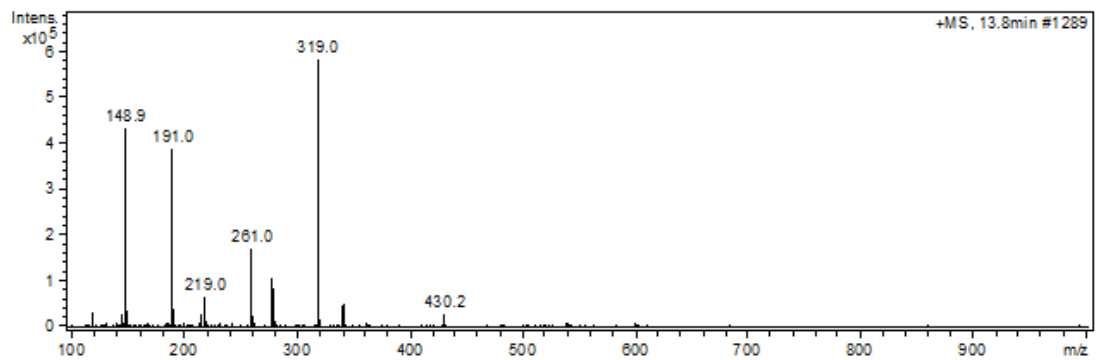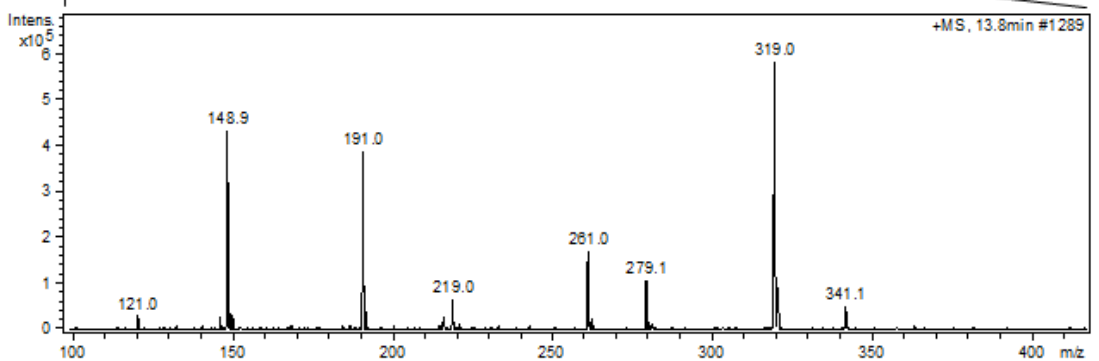

## Supporting Fig. 4.

(1)

```
Paenibacillus sp. JDR-2: Pjdr2_0345 -----MSENGKILVMTAVERD
Desulfotomaculum reducens: Dred_3235 -----MELKLVEKVATPHGLMPGRAEMRVLVMTAVSAERD
Brevibacillus brevis: BBR47_09530 -----MILSQYRSILVVT SVDAERD
Geobacillus sp. Y412MC10: GYMC10_1380-----MQEHTQSNVDTIESYSSAPHSSKRVLIVTAVDAEKD
Bacillus halodurans: BH2690 MSGGKGLSLEKNMDFRYTRKGTYYIRRSWHISMFNQKVL IATSVTAEQK
Bacillus pseudofirmus: BpOF4_09540 -----MSDEGRILIVVSVDAEKE
Streptomyces coelicolor: SCO4327 -----MSRPG
Streptomyces avermitilis: SAV_3905 -----MARAFTPAPHEVPLPG
Streptomyces scabiei: SCAB_50841 -----MARALPGPATEVRLPA
Streptomyces griseus: SGR_3174 -----MRVLVVTAVPVERDAVTRAFGGAPEAVALPG
```

(2)

```
Paenibacillus sp. JDR-2: Pjdr2_0345 -----MSENGKILVMTAVERD
Desulfotomaculum reducens: Dred_3235 -----MELKLVEKVATPHGLMPGRAEMRVLVMTAVSAERD
Brevibacillus brevis: BBR47_09530 -----MILSQYRSILVVT SVDAERD
Geobacillus sp. Y412MC10: GYMC10_1380-----MQEHTQSNVDTIESYSSAPHSSKRVLIVTAVDAEKD
Bacillus halodurans: BH2690 MSGGKGLSLEKNMDFRYTRKGTYYIRRSWHISMFNQKVL IATSVTAEQK
Bacillus pseudofirmus: BpOF4_09540 -----MSDEGRILIVVSVDAEKE
Streptomyces coelicolor: SCO4327 -----MHL LVATAVSVERDAVARAF P APGTEMSRPG
Streptomyces avermitilis: SAV_3905 -----MARAFTPAPHEVPLPG
Streptomyces scabiei: SCAB_50841 -----MARALPGPATEVRLPA
Streptomyces griseus: SGR_3174 -----MRVLVVTAVPVERDAVTRAFGGAPEAVALPG
```

(3)

```
GTGCACCTCCTCGTGGCCACCGGGTCTCCGTGCGAACGGGACGCGGTGGCTCGGGCGTTCGCCGCGCCGGGACGGAG
GTGTCCCGCCCCGGGATCACCTCCACCGGCTGCCGGACGGCTGGGACCTGCTGGCCGCGGGGTGGGCCCGGCCCGC
GCCGCCCTCCACGGCCGCGCCCTGACCGCGGCCCTCGACGGCAGGCCCTACGACCTGGTCTGCTCGGCCGGT
ATCGGCGGGCTTCGCGCCCCGAGGCGCCCGTCCGCTCCCTGGTCTGCTCGCCGACGCGATCACCGCCCGCCACCTGGGC
GCCGAGACCGCCGACGGCTTCCTGCCGGTACCGACCTCGGCTTCGGCACCGTACCCACCTGCCCGCCGCCCTCTG
GTCCGCGCCCGCCGAGGCGACCGGGCCCGGCCCGCCCGCACCGTGGTACCGGGTCCACCGTACCGGCACCGCGGCC
CGCGCCGCTGCTGCGCGAGCGCCACCGGGCGCCCTGGCCGAGGCGATGGAGGGCTTCGGCTCGCCGAGGCCCGC
GCCGCGACGGCTTCGGGTGCTGGAACCTGCGCGGGTCTCCAATCCGGTTCGGACCGCGGACCGCGCCCGCTGGCGC
ATCGGCGAGGCGCTCGCGCCCTGACGGACCGCTCGGGAAGCTCGCACCCGTCTTGAGAGTTGGAACCGCATGAG
CGCTGA
```

Alignments of the original SCO4327 ORF (1) and the estimated SCO4327 ORF (2) with MqnB orthologs. Extended amino acid (2) and nucleotide (3) sequences were shown in red letters (3).
